# Supplementary material
Source: PubMed Central journal article supplement (PMC2681382)

## **SUPPLEMENTAL FIGURES**

**Supplemental Figure 1. Distribution of eIF4E in HeLa cells upon heat stress.** Untreated (A) or heat stressed (B) HeLa cells were fixed, and stained for eIF4E and G3BP.

**Supplemental Figure 2. SG formation upon heat shock is rapid.** Wild-type and DKO MEFs where untreated (A) exposed to 44°C for 10 (A), 20 (B) or 30 (B) min, fixed, and stained for eIF4E and G3BP.

**Supplemental Figure 3. Relocalization of eIF4E in DKO MEFs in the presence of 4E-BP1.** WT MEFs are stably expressing GFP whereas DKO MEFs are stably expressing either GFP alone or GFP and 4EBP1. Cells are mock treated (A) or heat shocked at 42°C for 30min (B). They were then fixed and stained for eIF4E (red) or G3BP (blue). GFP (green) was used as an indicator of positively infected cells.

**Supplemental Figure 4. SG formation is readily reversible.** SG induction was performed on WT and DKO MEFs by exposing cells to 44°C/30 min, after which time, cells were transferred to 37°C for 1 (A), 2 (A), 3 (B), or 4(B) hours. Cells were then fixed and stained for eIF4E and G3BP.

**Supplemental Figure 5.** Cell viability following recovery from heat shock is not affected by the presence or absence of 4E-BP1/2. Following heat shock at 44°C/30 min, WT and DKO MEFs were allowed to recovery for 6 h at 37°C, after which time Annexin V-Propidium Iodide labelling was performed to determine the fraction of apoptotic cells.

**Supplemental Figure 6. Rapamycin alters the subcellular localization of eIF4E to SGs in wt, but not DKO, MEFs.** WT (A) or DKO (B) MEF cells were exposed to vehicle (untreated) or to rapamycin (RAP: 20 nM for 1hr) or heat shock (HS: 44°C/30 min) or RAP treatment followed by a heat shock (RAP/HS). Cells were fixed and stained for eIF4E and G3BP.

**Supplemental Figure 7. Consequences of HS and Rapamycin on 4E-BP1 phosphorylation.** Western blot of 4E-BP1 from WT and DKO MEFs treated with Rapamycin (RAP: 20 nM for

1hr) or heat shock (HS: 44°C/30 min) or RAP treatment followed by a heat shock (RAP/HS).  $\beta$ -Actin is used as a loading control.

**HeLa**  
**37°C**  
**G3BP**

**eIF4E**

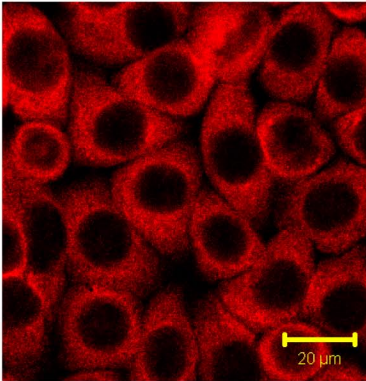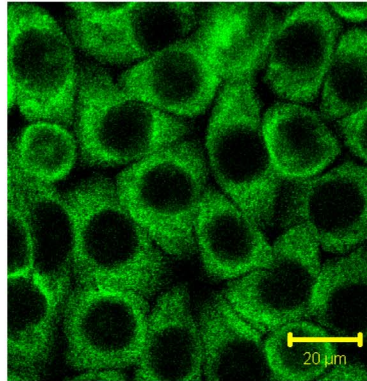

**overlay**

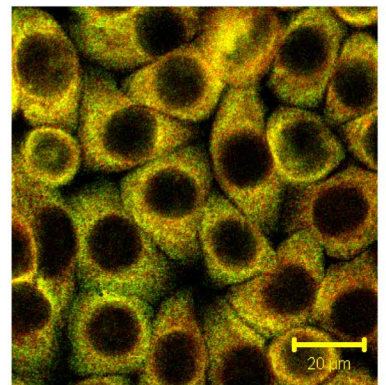

**44°C**  
**G3BP**

**eIF4E**

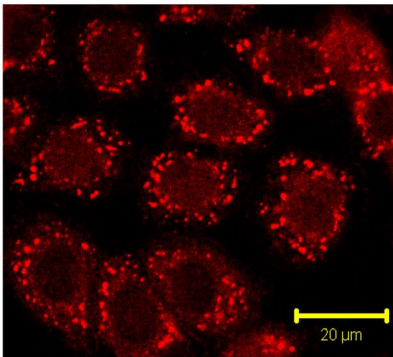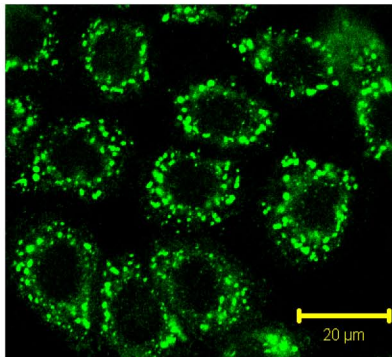

**overlay**

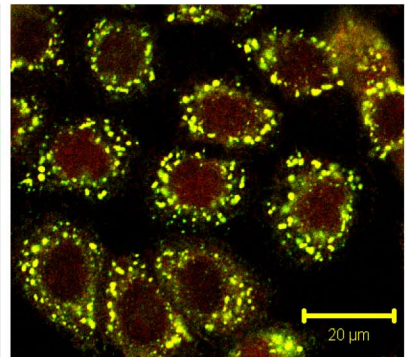



**A****Untreated****4E****G3BP****Overlay****WT**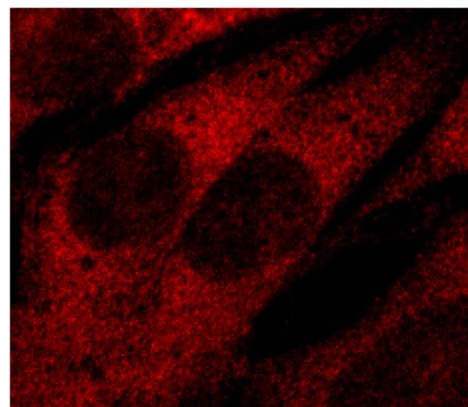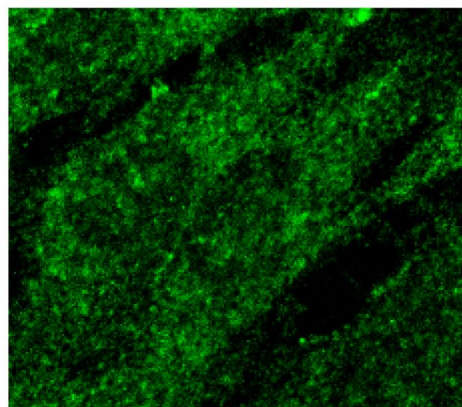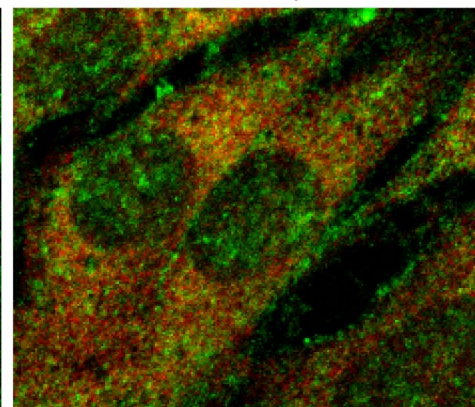**DKO**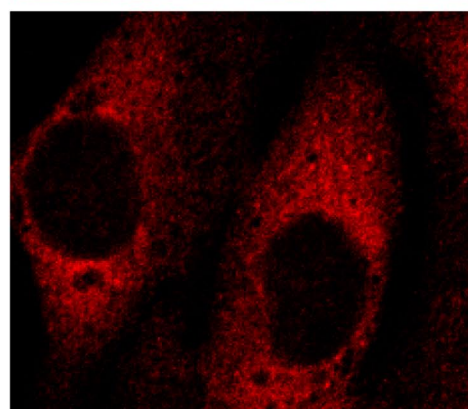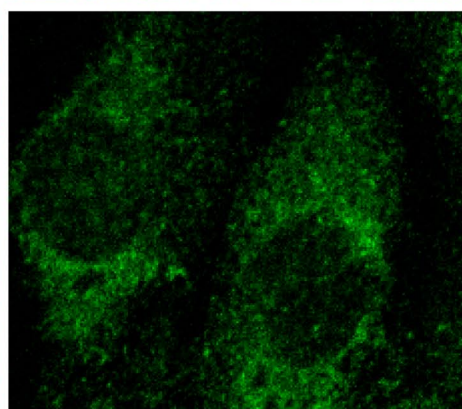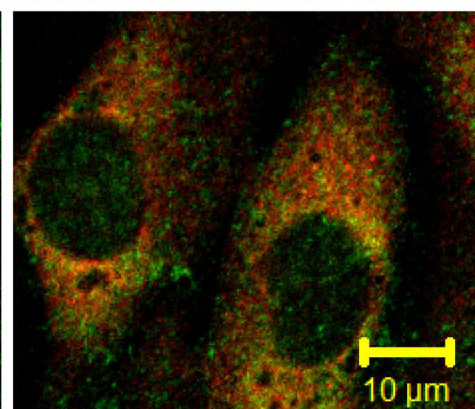**44°C-10min****WT**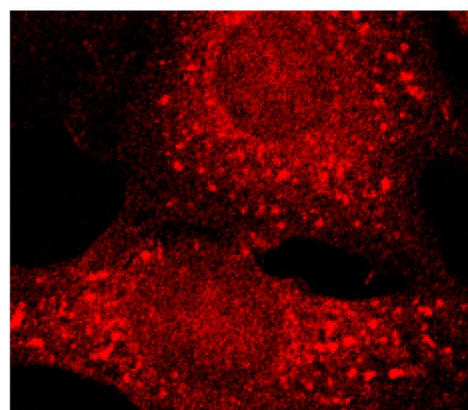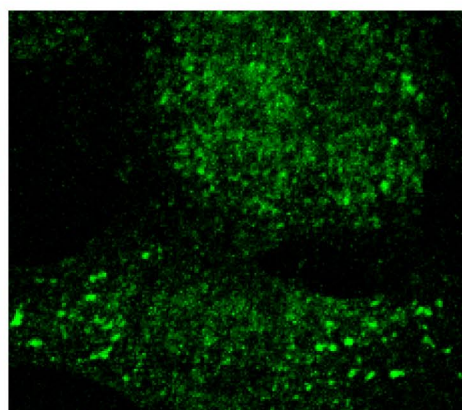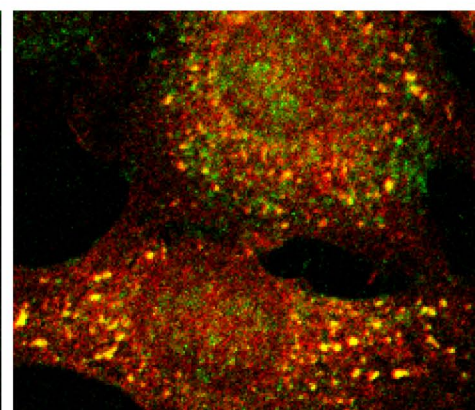**DKO**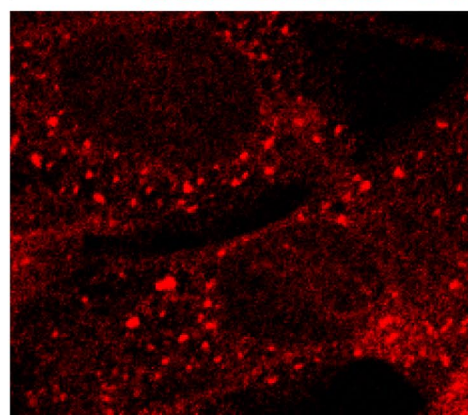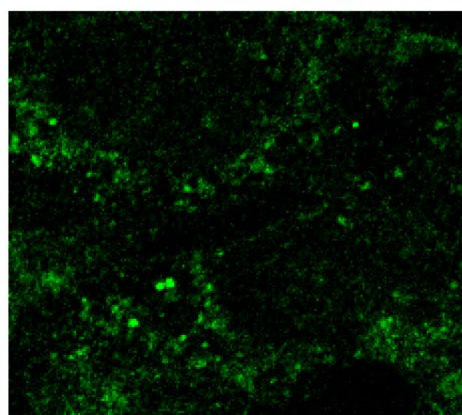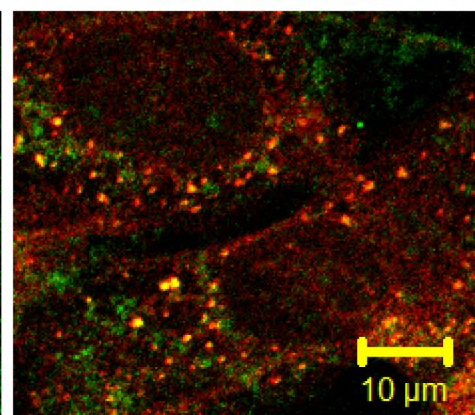



**B****44°C-20min****4E****G3BP****Overlay****WT**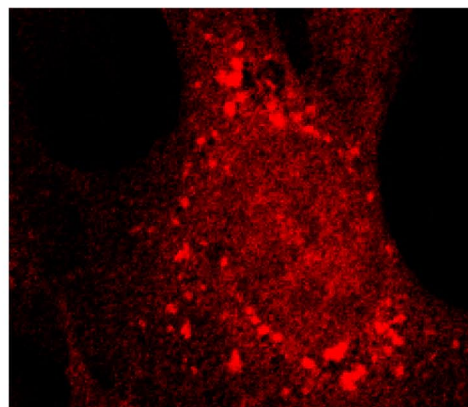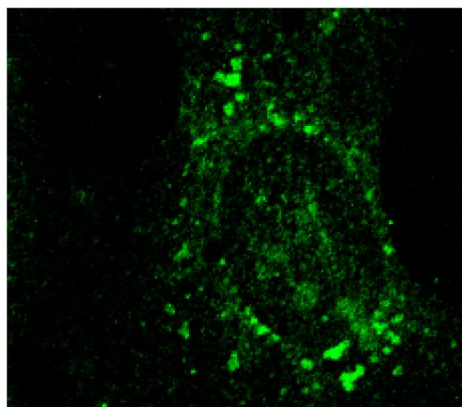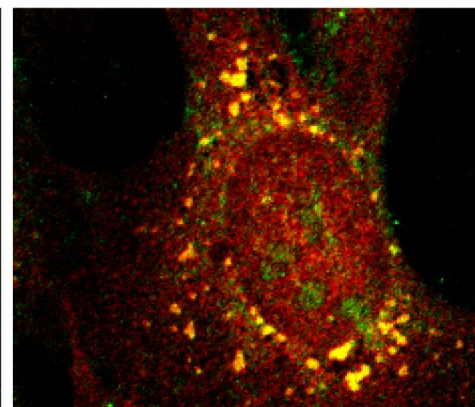**DKO**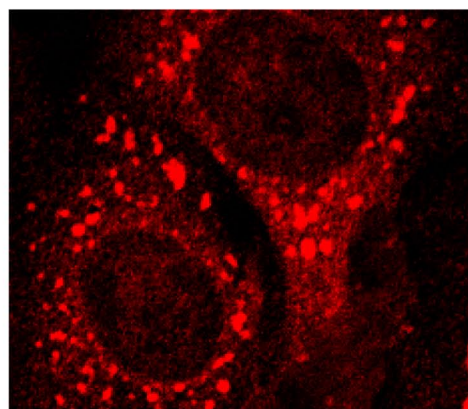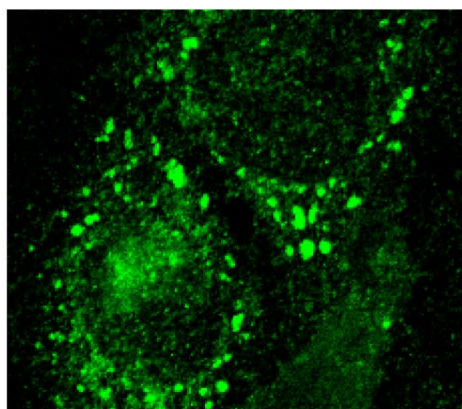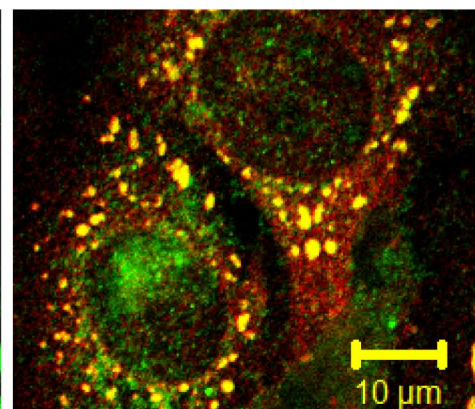**44°C-30min****WT**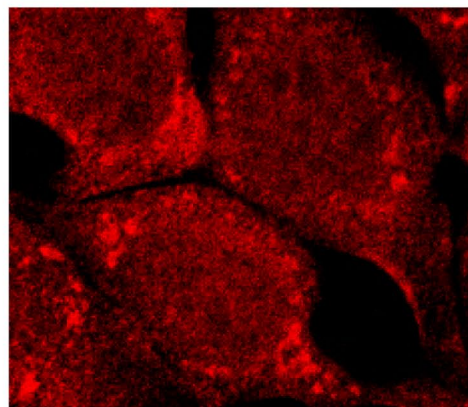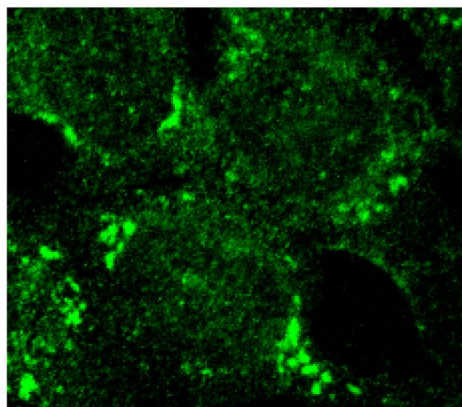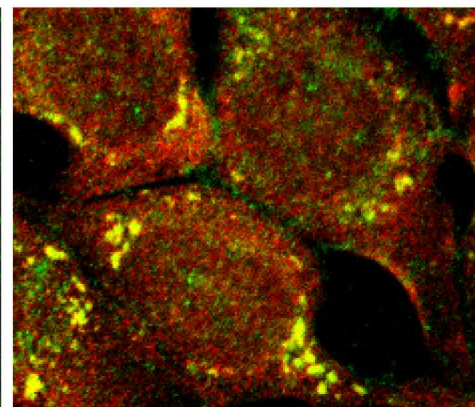**DKO**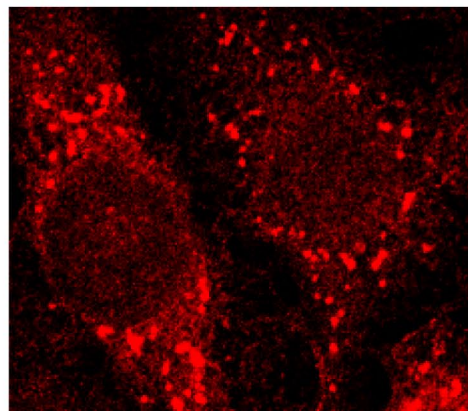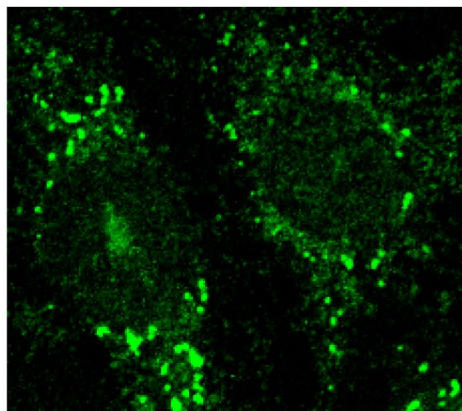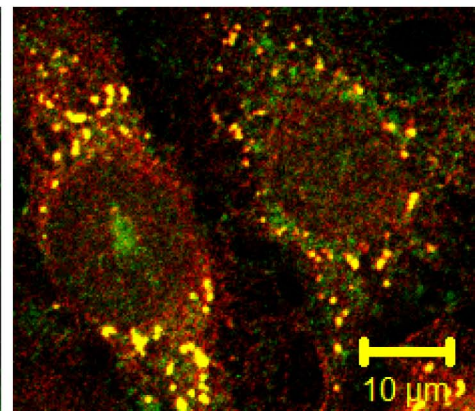



**A**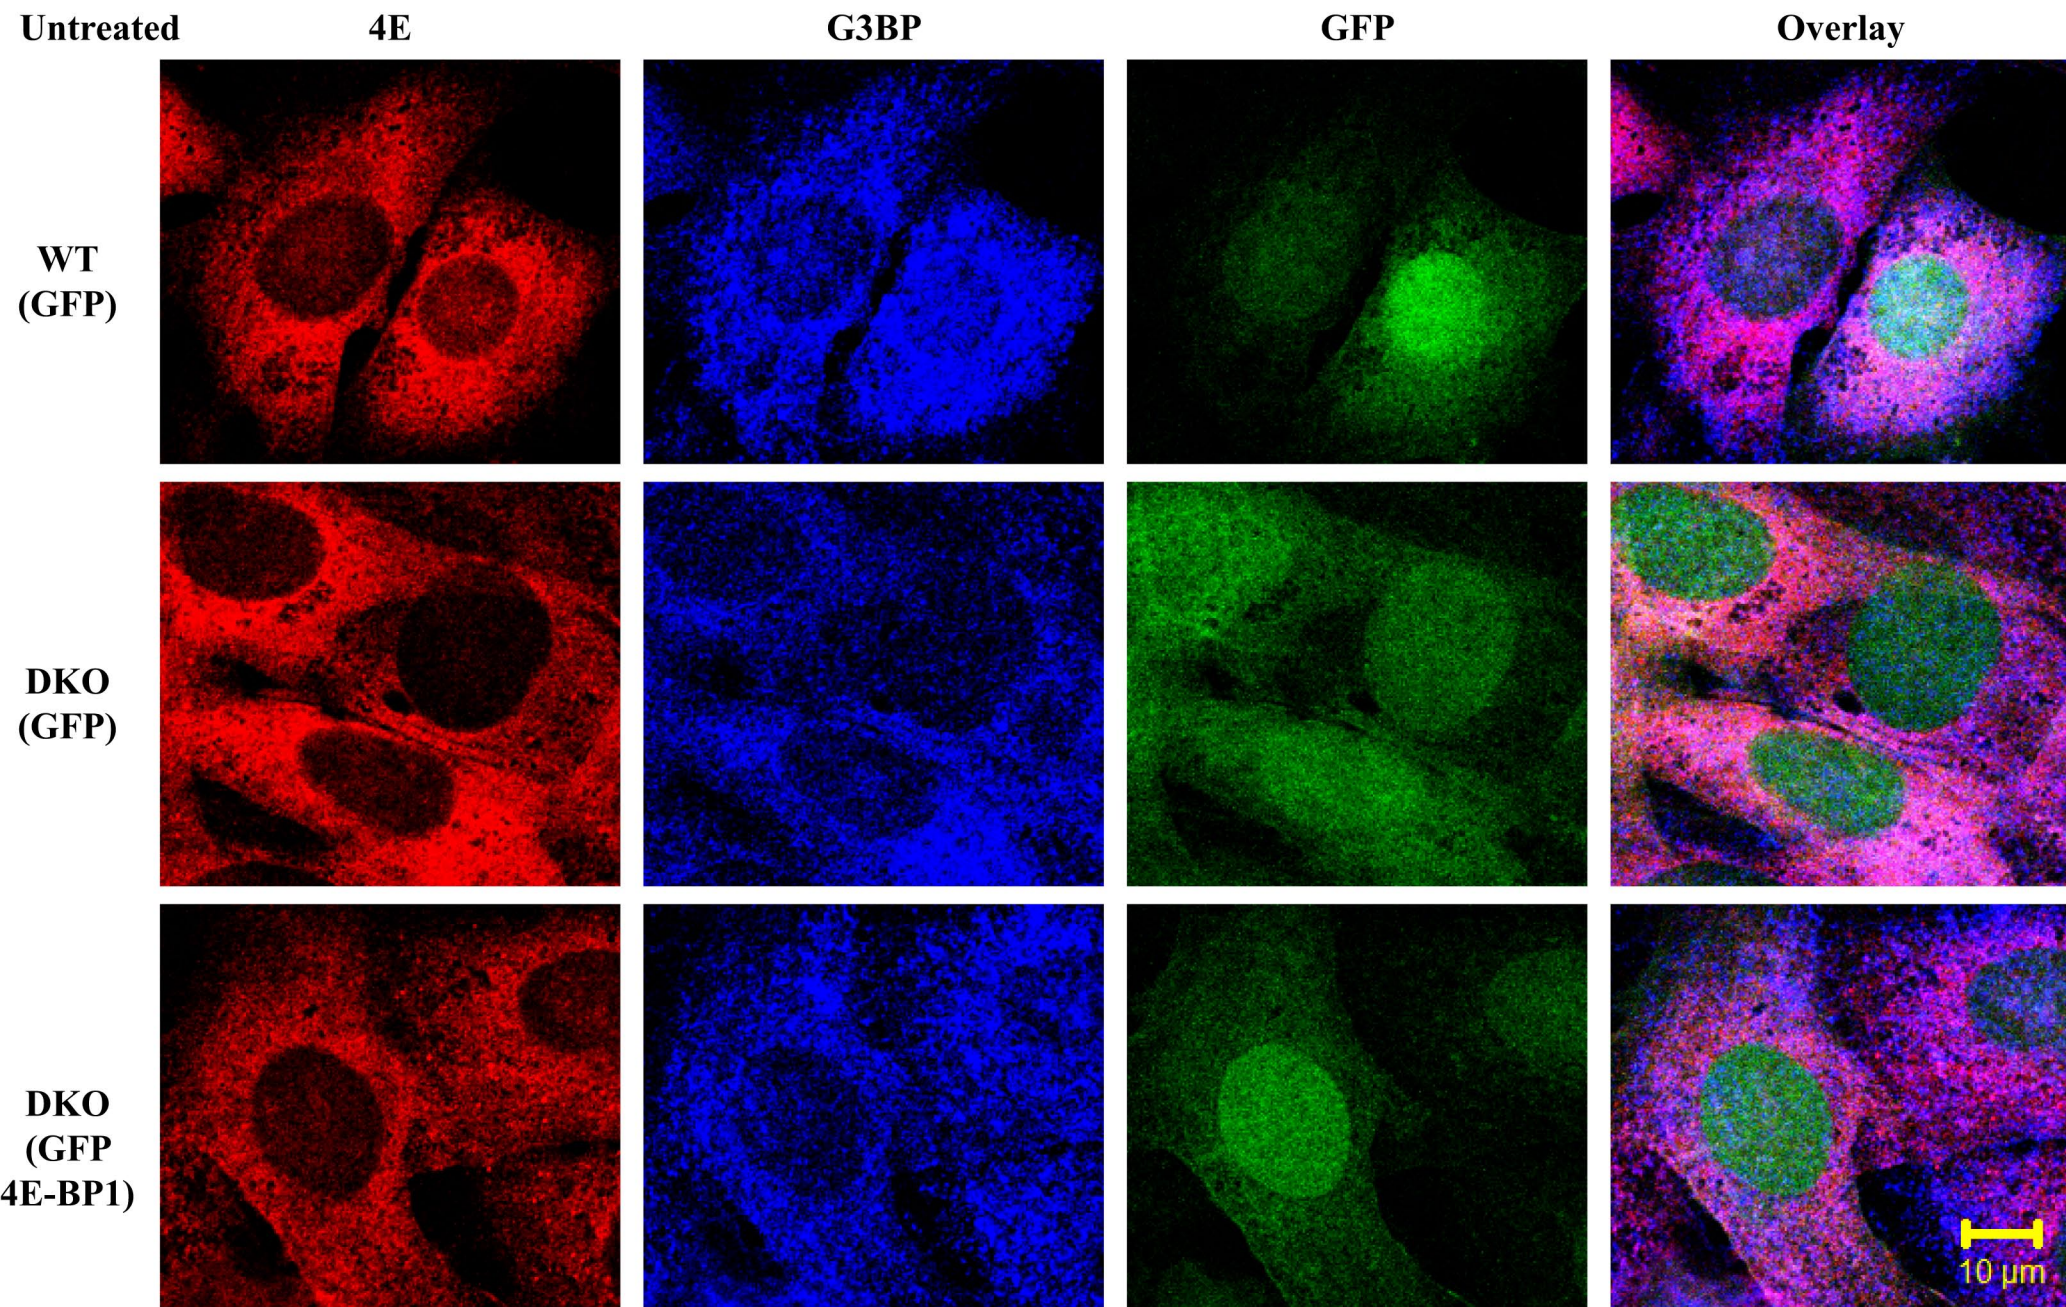



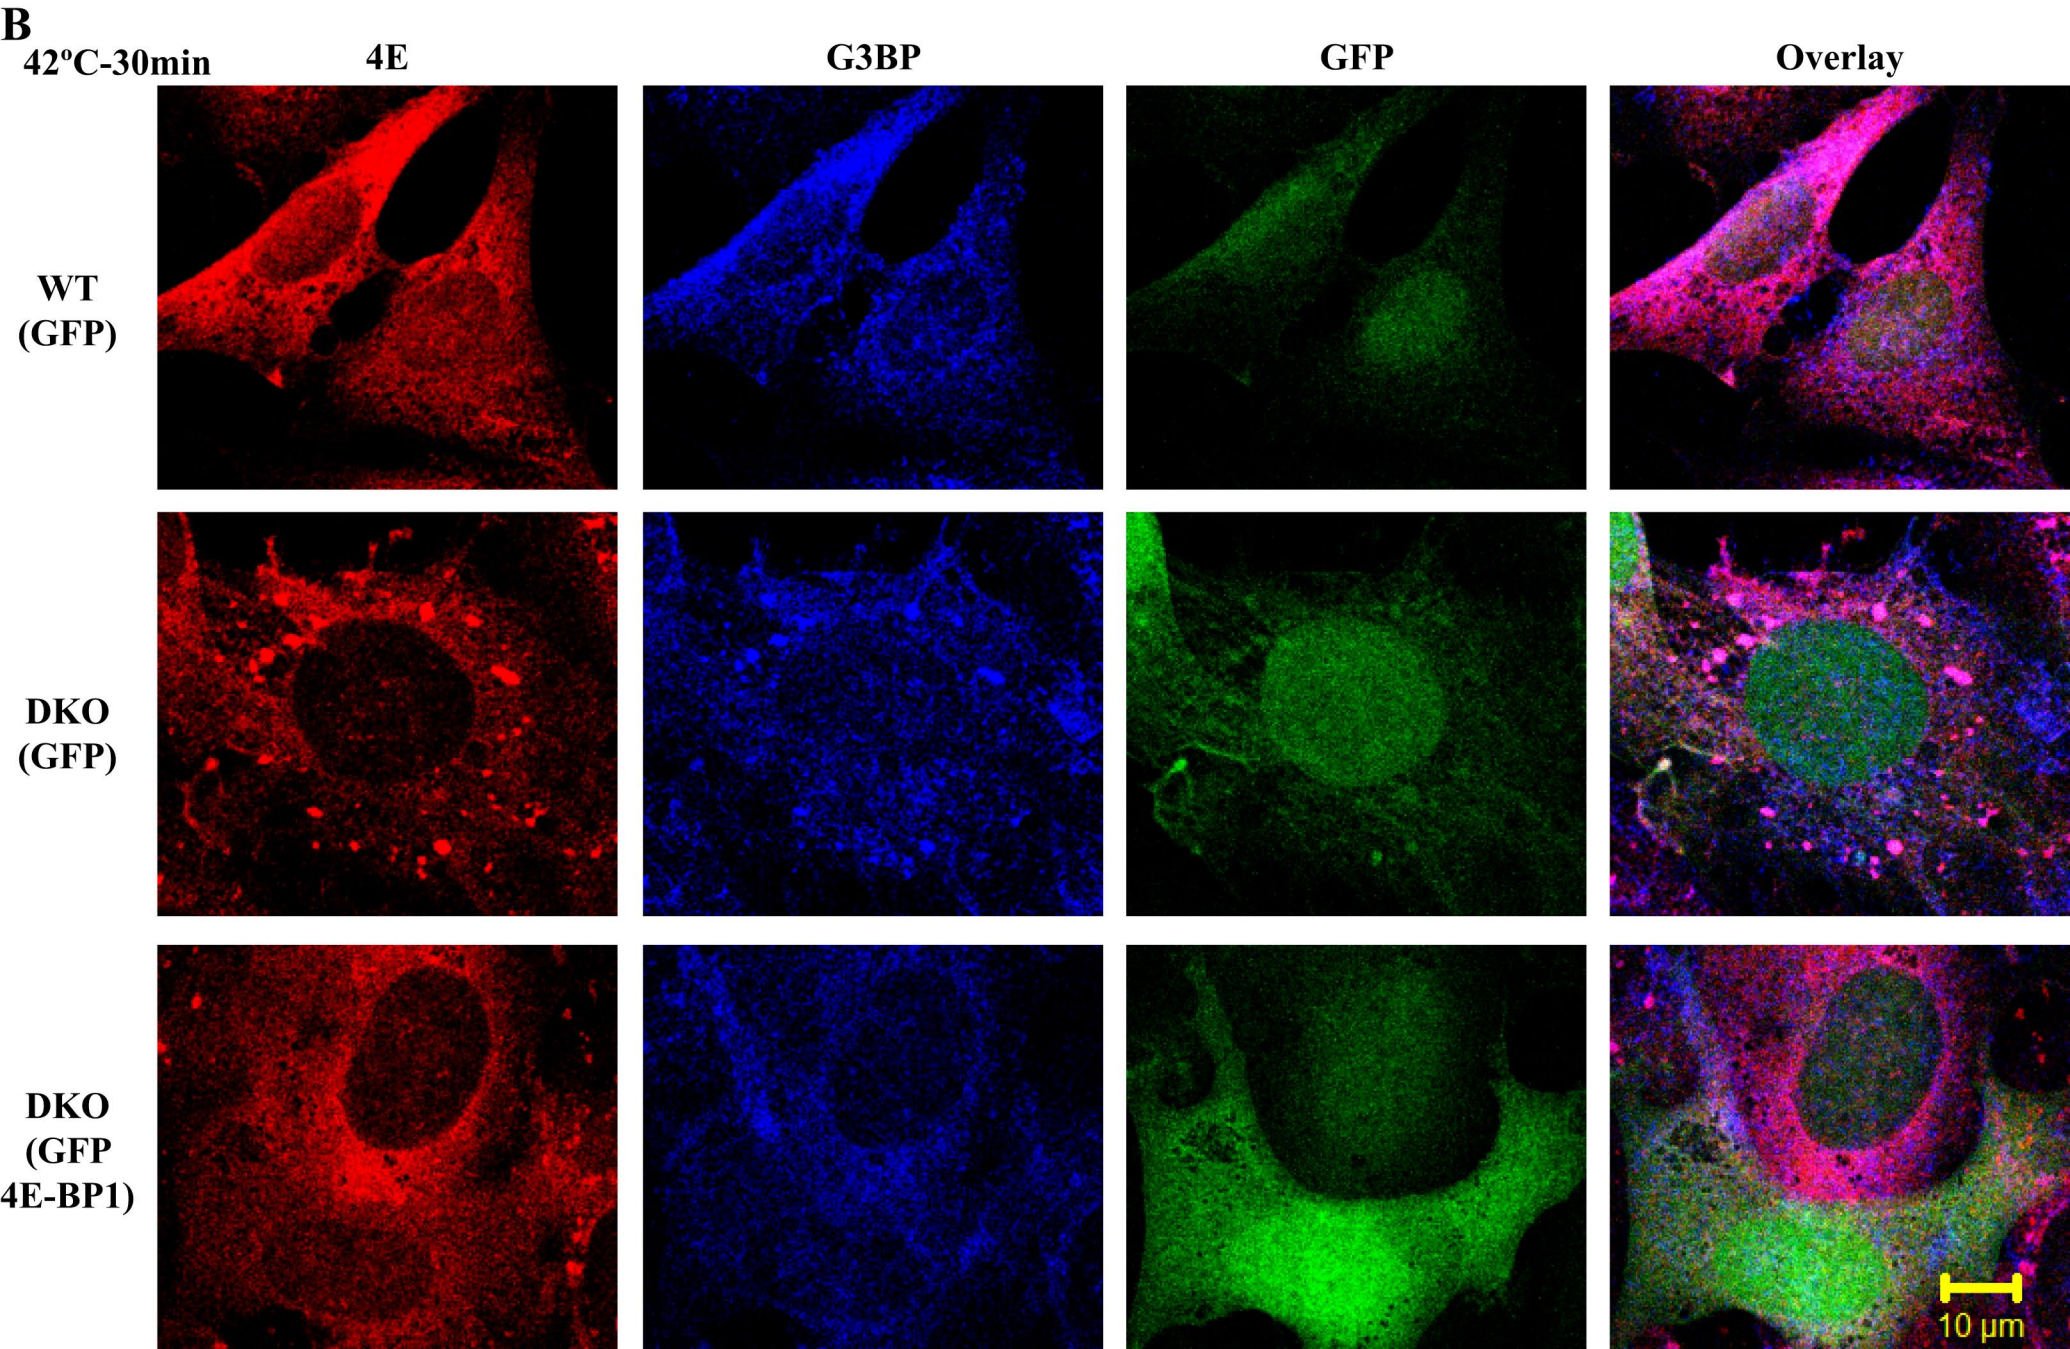



**A****44°C-30min  
Rescue 1h****4E****G3BP****Overlay****WT**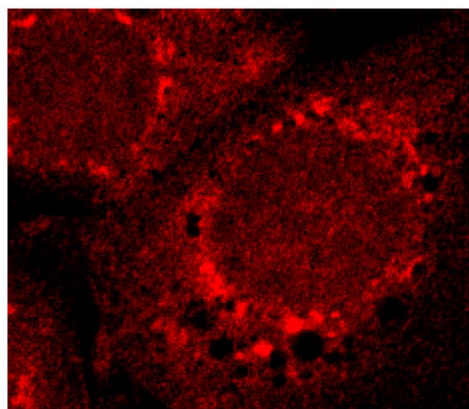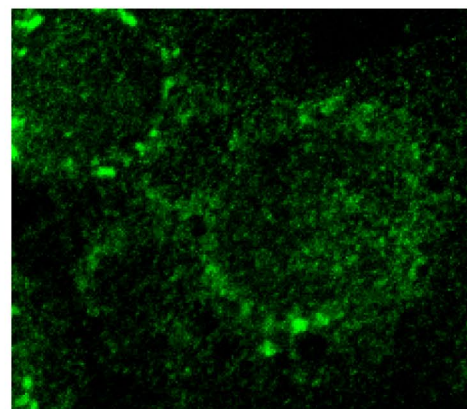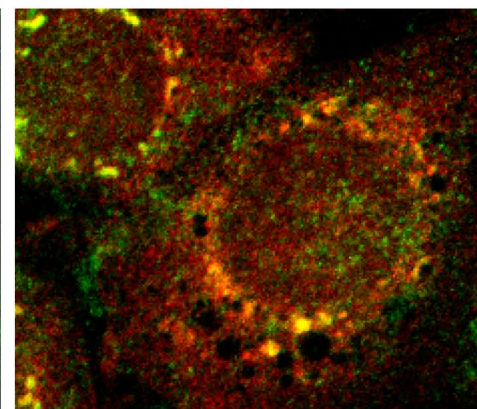**DKO**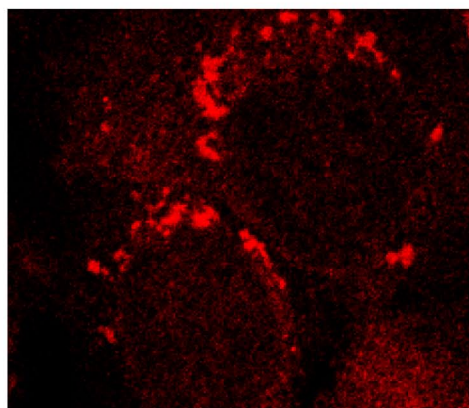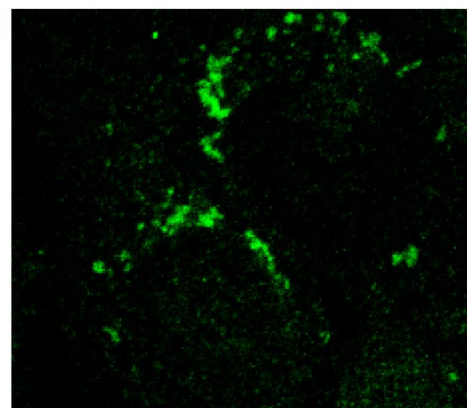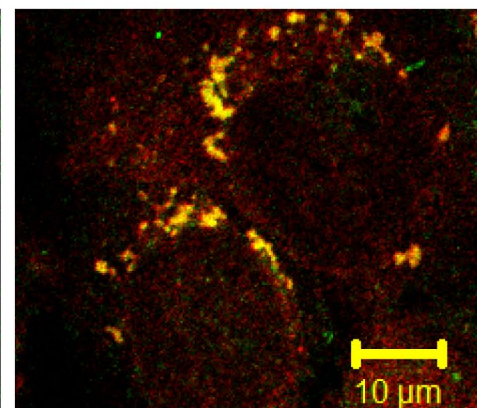**44°C-30min  
Rescue 2h****WT**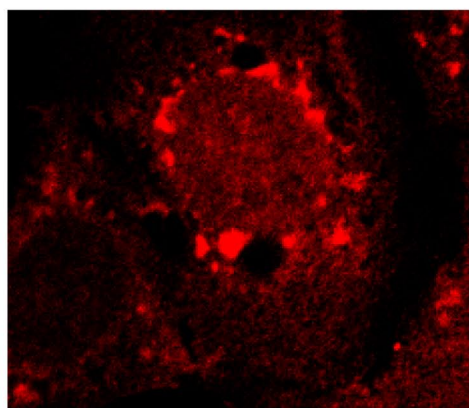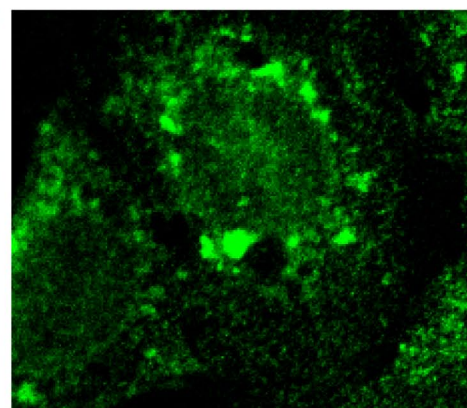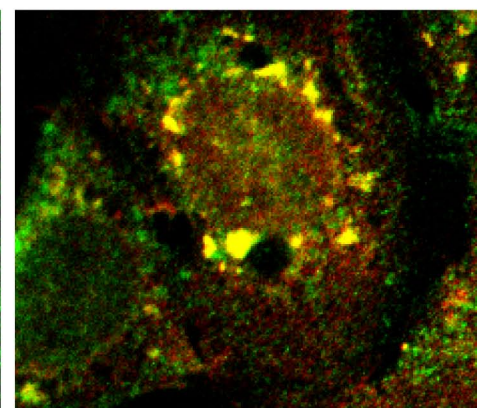**DKO**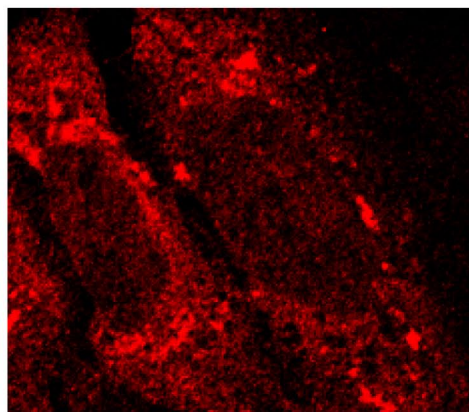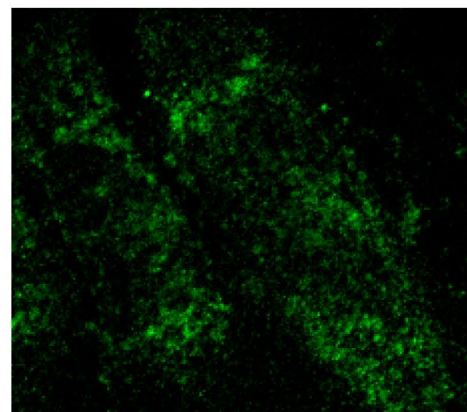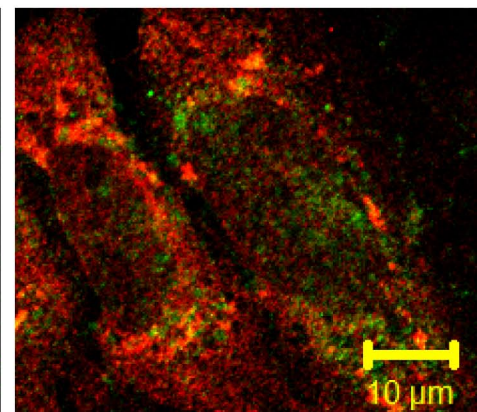



**B****44°C-30min  
Rescue 3h****4E****G3BP****Overlay****WT**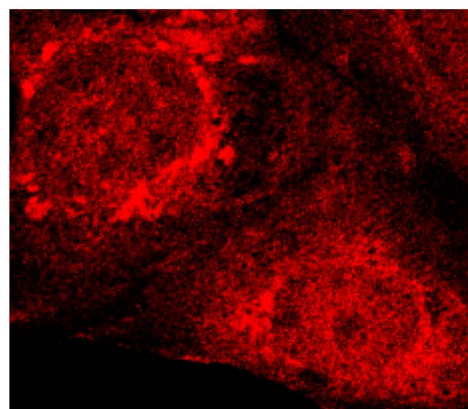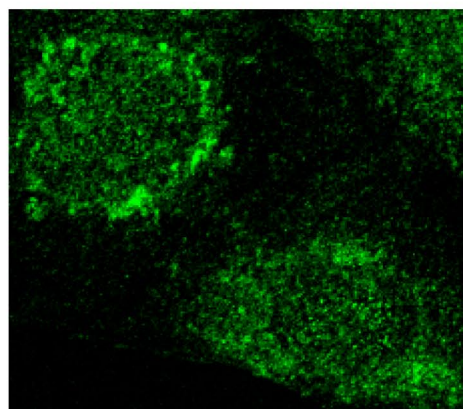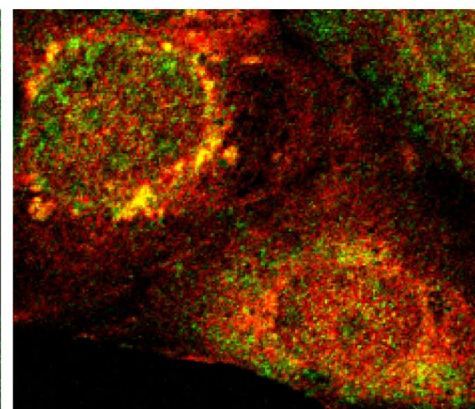**DKO**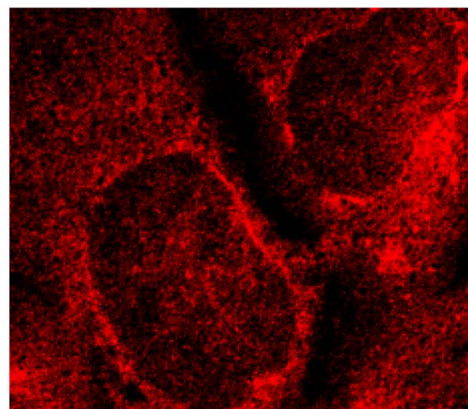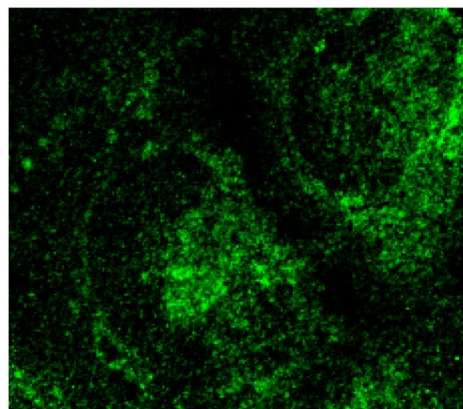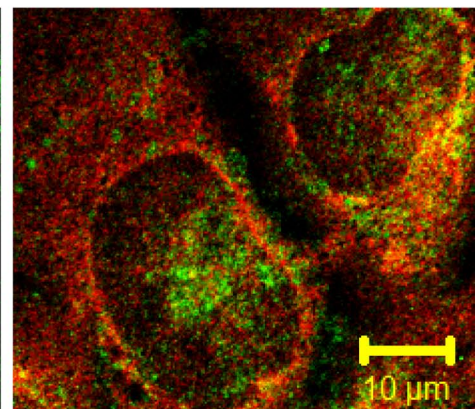**44°C-30min  
Rescue 4h****WT**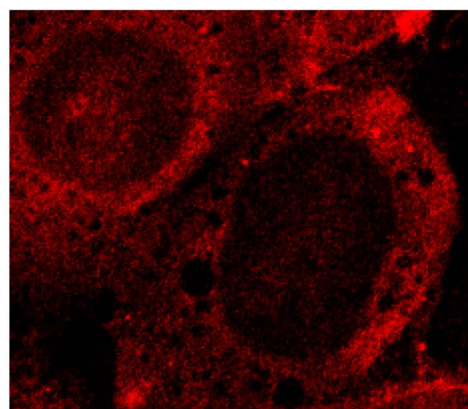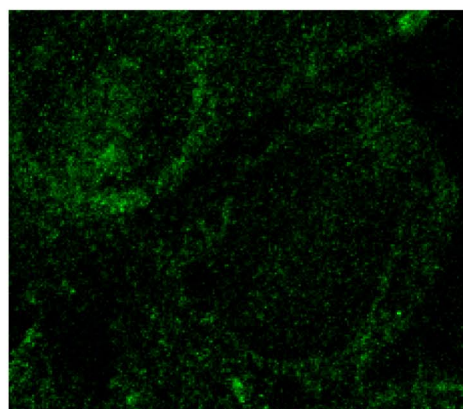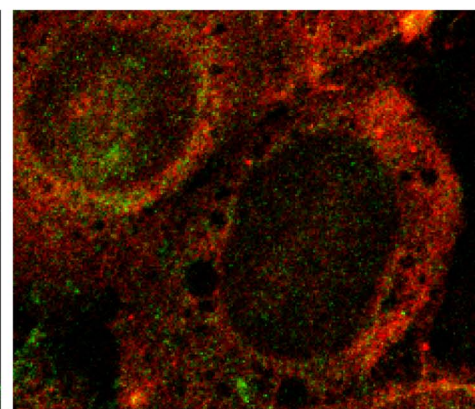**DKO**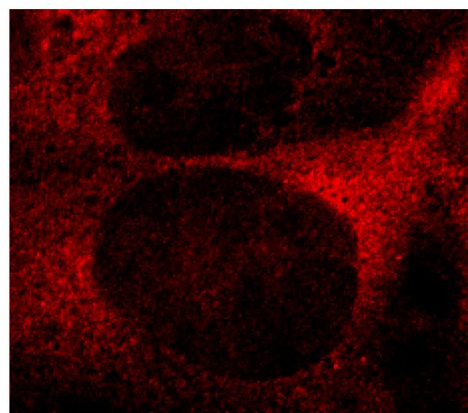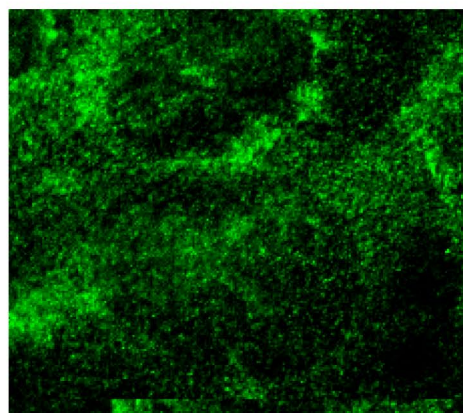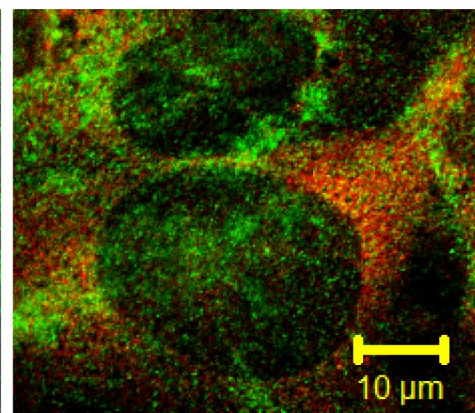



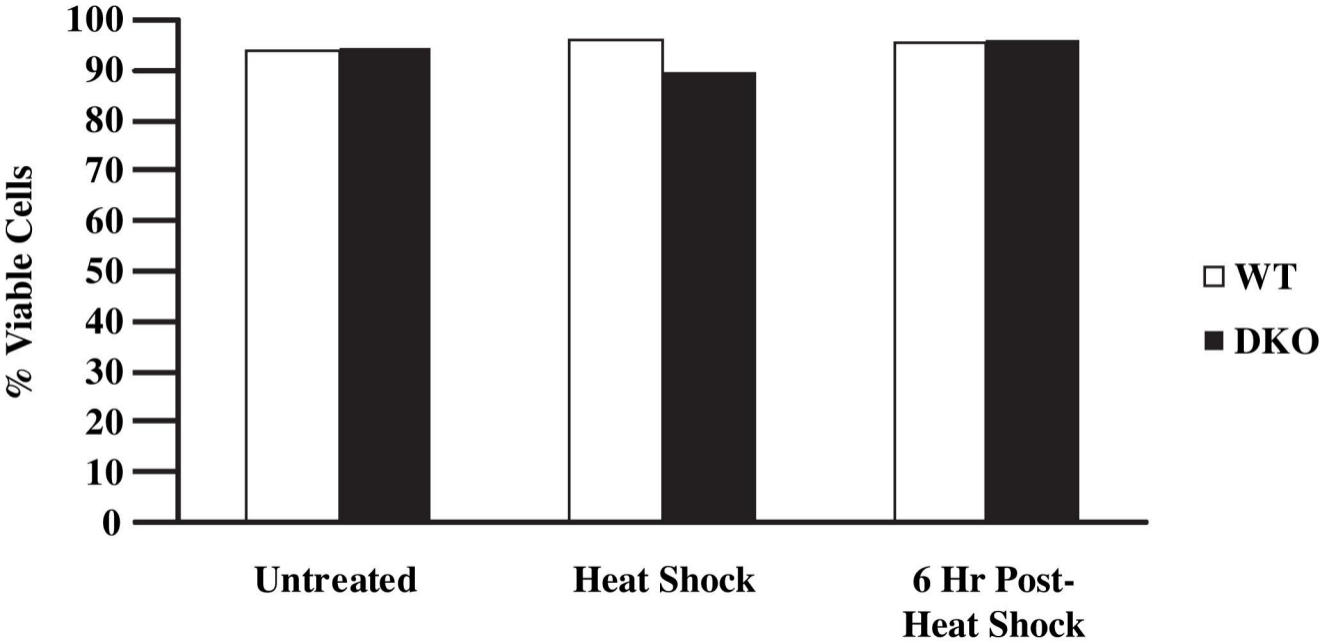



**A****4E****G3BP****Overlay****Untreated**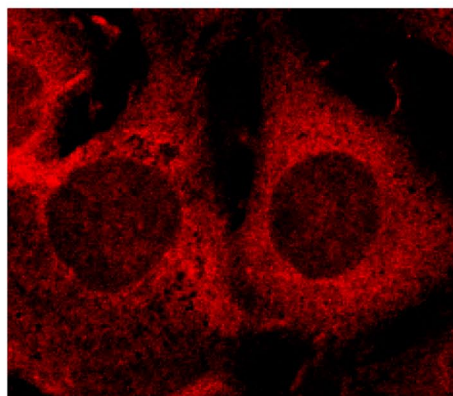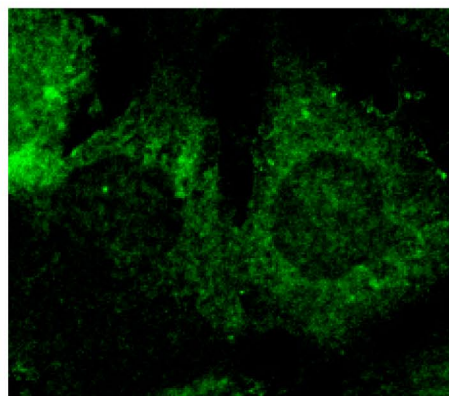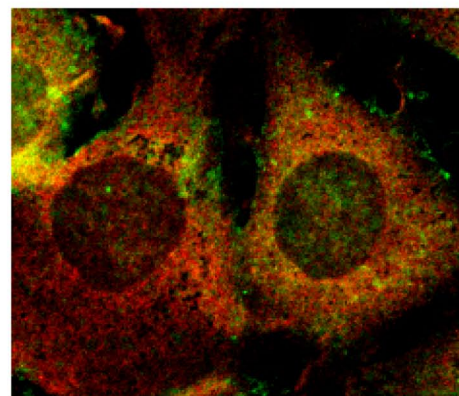**RAP**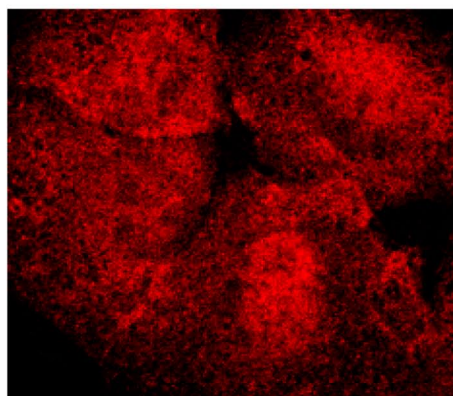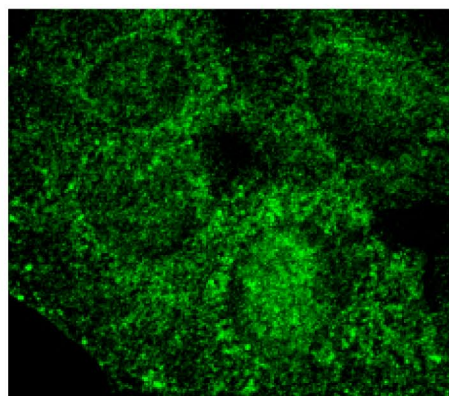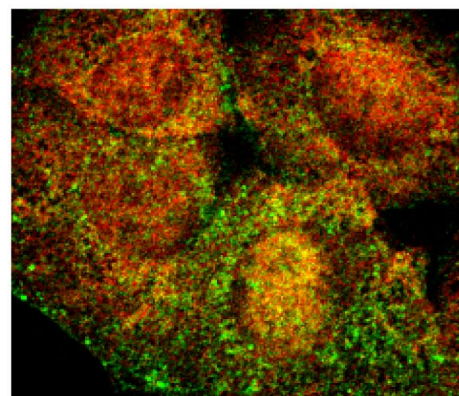**HS**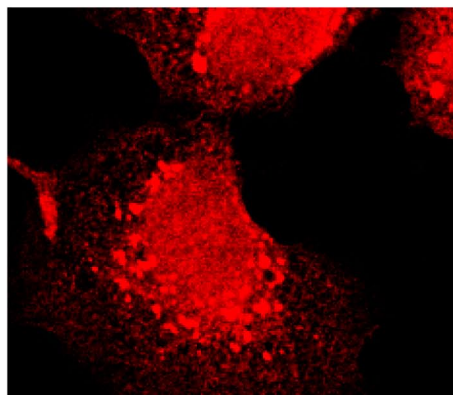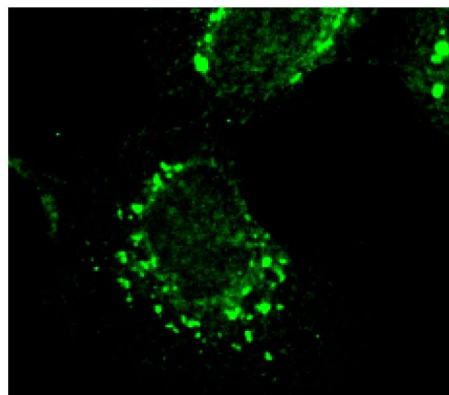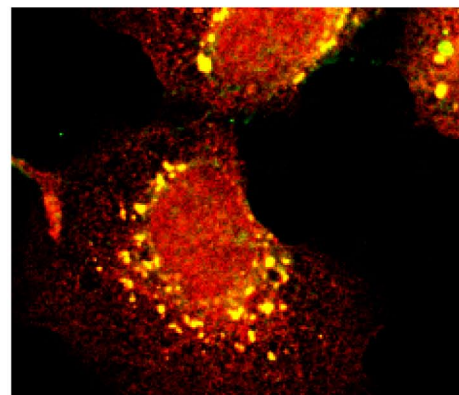**HS+RAP**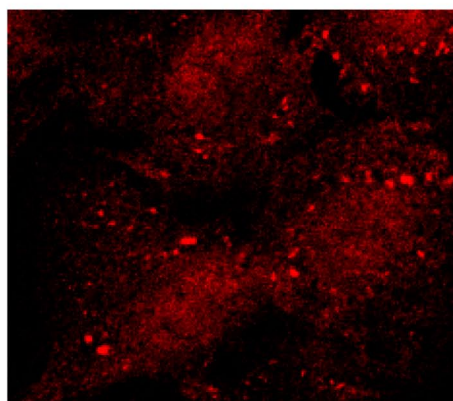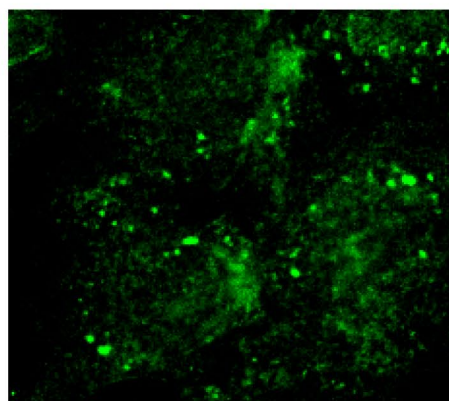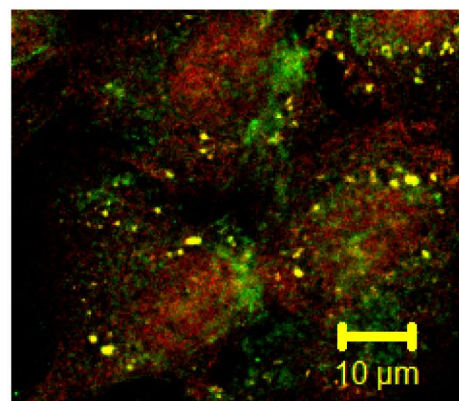**10  $\mu$ m**



**B****4E****G3BP****Overlay****Untreated**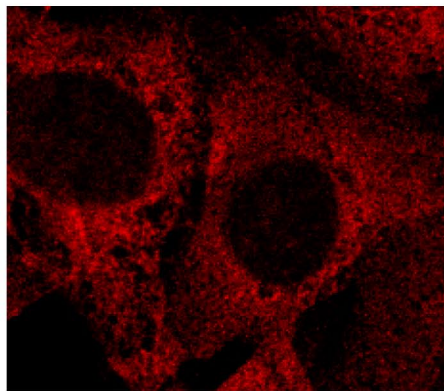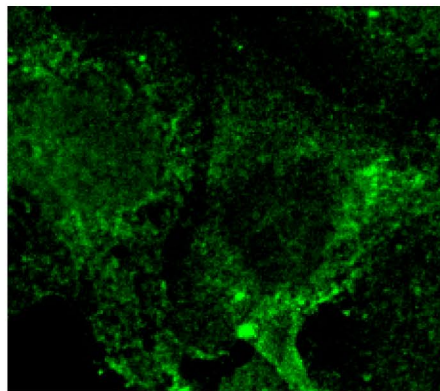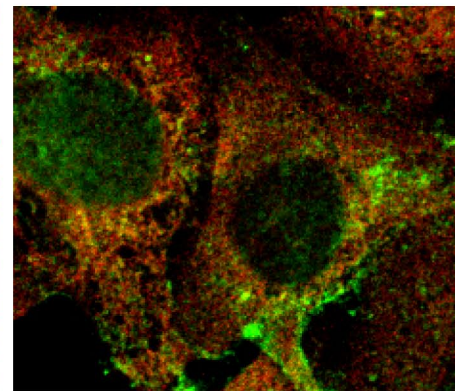**RAP**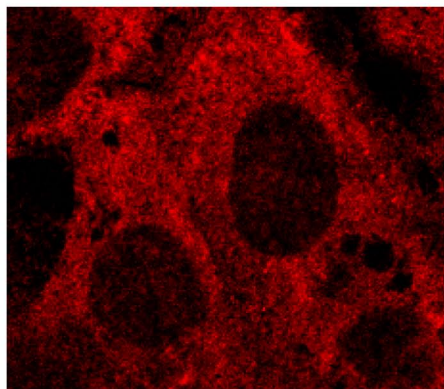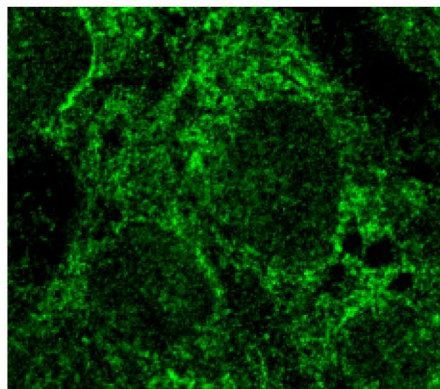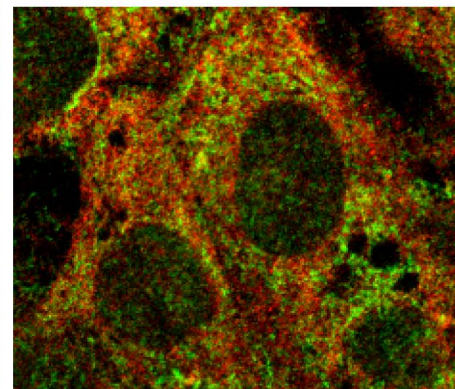**HS**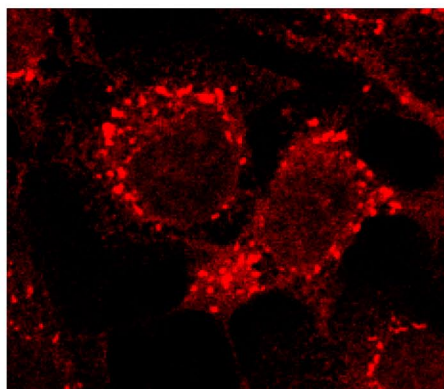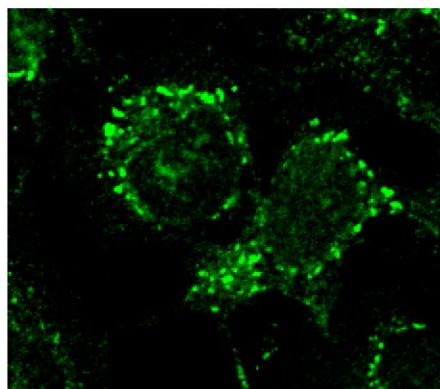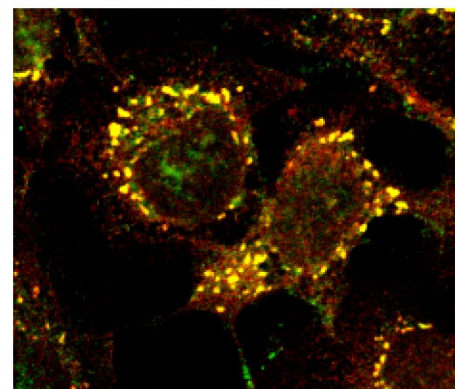**HS+RAP**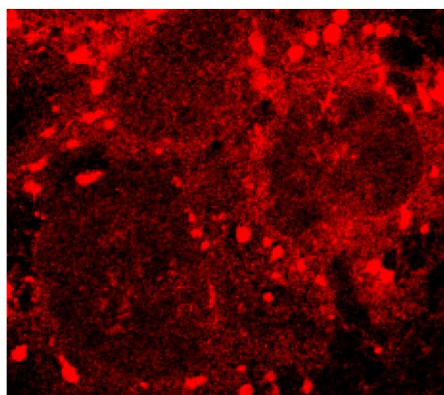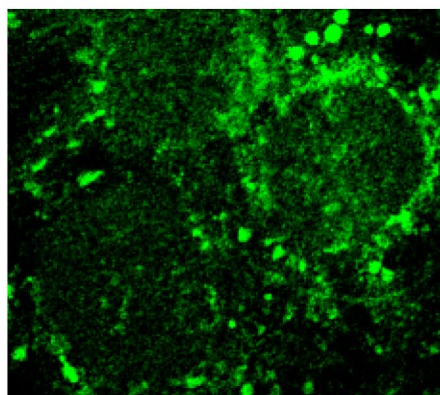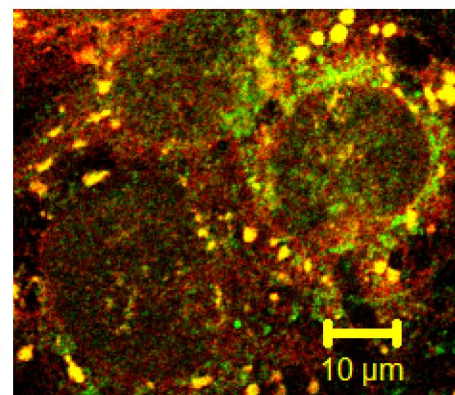**10 μm**

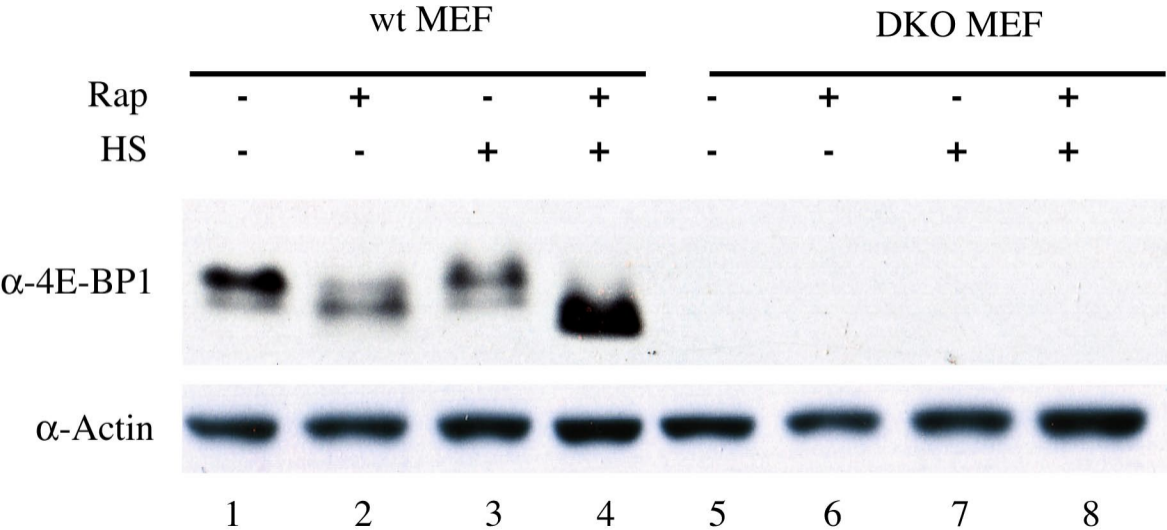

Supplement: 00511.2008_1.pdf [file 00511.2008_1.pdf]
